# Supplementary material for: Use of GLP-1 Receptor Agonists is Associated with an Increased Rate of Upper Eyelid Blepharoplasty
Source: Research Square preprint supplement (doi:10.21203/rs.3.rs-9665910/v1), 2026-05-26
Supplement: Supplementary file 1 [file cd2041997054e14b01205ee7.docx]

| **Cohort 1 and cohort 2 patient count before and after propensity score matching** | | | | | | | | | | | | |
| --- | --- | --- | --- | --- | --- | --- | --- | --- | --- | --- | --- | --- |
|  | | | Cohort | | | Patient count before matching | | | | Patient count after matching | | |
|  | | | 1 – Control: DM + HTN + Female | | | 792,822 | | | | 23,349 | | |
|  | | | 2 - GLP-1 + DM + HTN + Female | | | 28,970 | | | | 23,349 | | |
| **Propensity score density function - Before and after matching (cohort 1 - purple, cohort 2 - green)** | | | | | | | | | | | | |
|  |  | | 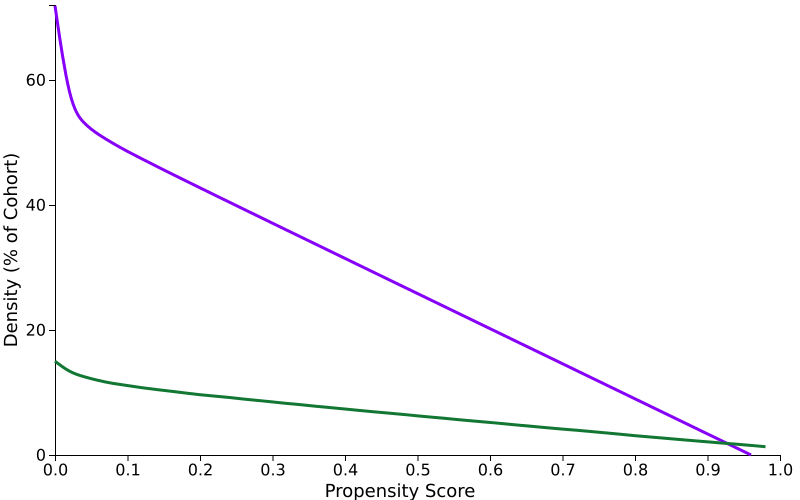 | | | | 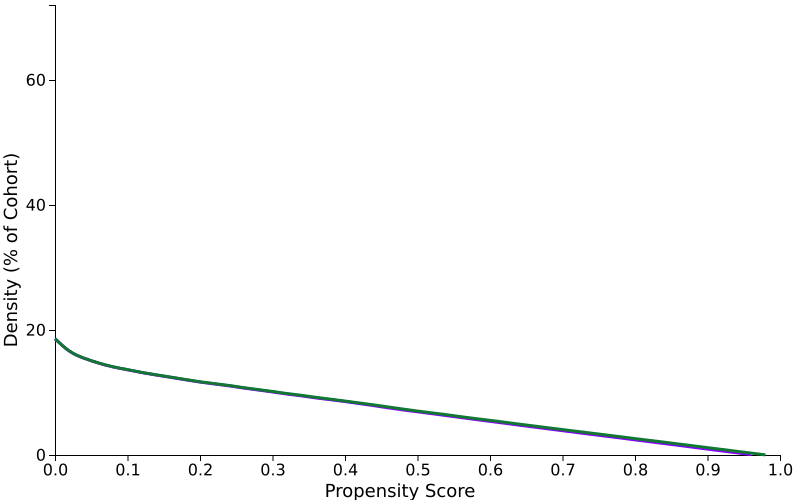 | | | | | |
| **Cohort 1 (N = 792,822) and cohort 2 (N = 28,970) characteristics before propensity score matching** | | | | | | | | | | | | |
|  | **Demographics** | | | | | | | | | | | |
|  |  | Cohort | | |  | Mean ± SD | | Patients | % of Cohort | | P-Value | Std diff. |
|  |  | 1 2 | | Age | Current Age | 77.0 +/- 9.0 68.3 +/- 11.4 | | 792,822 28,970 | 100% 100% | | <0.001 | 0.840 |
|  |  | 1 2 | | AI | Age at Index | 68.2 +/- 10.0 60.6 +/- 11.6 | | 792,822 28,970 | 100% 100% | | <0.001 | 0.707 |
|  |  | 1 2 | | 2106-3 | White |  | | 509,877 18,145 | 64.3% 62.6% | | <0.001 | 0.035 |
|  |  | 1 2 | | F | Female |  | | 792,822 28,970 | 100% 100% | | -- | -- |
|  |  | 1 2 | | 2186-5 | Not Hispanic or Latino |  | | 655,820 23,044 | 82.7% 79.5% | | <0.001 | 0.081 |
|  |  | 1 2 | | 2135-2 | Hispanic or Latino |  | | 81,569 3,535 | 10.3% 12.2% | | <0.001 | 0.061 |
|  |  | 1 2 | | 2028-9 | Asian |  | | 62,251 1,677 | 7.9% 5.8% | | <0.001 | 0.082 |
|  | **Diagnosis** | | | | | | | | | | | |
|  |  | Cohort | | |  | Mean ± SD | | Patients | % of Cohort | | P-Value | Std diff. |
|  |  | 1 2 | | I10 | Essential (primary) hypertension |  | | 381,585 20,478 | 48.1% 70.7% | | <0.001 | 0.472 |
|  |  | 1 2 | | E08-E13 | Diabetes mellitus |  | | 323,596 23,010 | 40.8% 79.4% | | <0.001 | 0.858 |
|  |  | 1 2 | | J44 | Other chronic obstructive pulmonary disease |  | | 51,281 1,972 | 6.5% 6.8% | | 0.021 | 0.014 |
|  |  | 1 2 | | N18 | Chronic kidney disease (CKD) |  | | 69,716 3,872 | 8.8% 13.4% | | <0.001 | 0.146 |
|  |  | 1 2 | | E78.5 | Hyperlipidemia, unspecified |  | | 246,307 15,956 | 31.1% 55.1% | | <0.001 | 0.500 |
|  | **Medication** | | | | | | | | | | | |
|  |  | Cohort | | |  | Mean ± SD | | Patients | % of Cohort | | P-Value | Std diff. |
|  |  | 1 2 | | 6809 | metformin |  | | 131,576 17,785 | 16.6% 61.4% | | <0.001 | 1.034 |
|  |  | 1 2 | | A10BK | Sodium-glucose co-transporter 2 (SGLT2) inhibitors |  | | 2,299 3,746 | 0.3% 12.9% | | <0.001 | 0.526 |
|  |  | 1 2 | | HS501 | INSULIN |  | | 129,883 14,383 | 16.4% 49.6% | | <0.001 | 0.756 |
|  | **Laboratory** | | | | | | | | | | | |
|  |  | Cohort | | |  | Mean ± SD | | Patients | % of Cohort | | P-Value | Std diff. |
|  |  | 1 2 | | 9083 | BMI | 30.2 +/- 6.3 30.8 +/- 5.3 | | 419,342 22,882 | 52.9% 79.0% | | <0.001 | 0.095 |
|  |  | 1 2 | |  | 0 - 0 kg/m2 |  | | 419,509 22,883 | 52.9% 79.0% | | <0.001 | 0.572 |
| **Cohort 1 (N = 23,349) and cohort 2 (N = 23,349) characteristics after propensity score matching** | | | | | | | | | | | | |
|  | **Demographics** | | | | | | | | | | | |
|  |  | Cohort | | |  | Mean ± SD | | Patients | % of Cohort | | P-Value | Std diff. |
|  |  | 1 2 | | Age | Current Age | 71.8 +/- 8.3 70.9 +/- 10.0 | | 23,349 23,349 | 100% 100% | | <0.001 | 0.101 |
|  |  | 1 2 | | AI | Age at Index | 63.8 +/- 9.0 63.0 +/- 10.3 | | 23,349 23,349 | 100% 100% | | <0.001 | 0.086 |
|  |  | 1 2 | | 2106-3 | White |  | | 14,910 14,739 | 63.9% 63.1% | | 0.100 | 0.015 |
|  |  | 1 2 | | F | Female |  | | 23,349 23,349 | 100% 100% | | -- | -- |
|  |  | 1 2 | | 2186-5 | Not Hispanic or Latino |  | | 18,416 18,708 | 78.9% 80.1% | | 0.001 | 0.031 |
|  |  | 1 2 | | 2135-2 | Hispanic or Latino |  | | 2,895 2,689 | 12.4% 11.5% | | 0.003 | 0.027 |
|  |  | 1 2 | | 2028-9 | Asian |  | | 1,196 1,338 | 5.1% 5.7% | | 0.004 | 0.027 |
|  | **Diagnosis** | | | | | | | | | | | |
|  |  | Cohort | | |  | Mean ± SD | | Patients | % of Cohort | | P-Value | Std diff. |
|  |  | 1 2 | | I10 | Essential (primary) hypertension |  | | 15,932 16,086 | 68.2% 68.9% | | 0.125 | 0.014 |
|  |  | 1 2 | | E08-E13 | Diabetes mellitus |  | | 18,243 17,694 | 78.1% 75.8% | | <0.001 | 0.056 |
|  |  | 1 2 | | J44 | Other chronic obstructive pulmonary disease |  | | 1,761 1,719 | 7.5% 7.4% | | 0.459 | 0.007 |
|  |  | 1 2 | | N18 | Chronic kidney disease (CKD) |  | | 3,390 3,227 | 14.5% 13.8% | | 0.031 | 0.020 |
|  |  | 1 2 | | E78.5 | Hyperlipidemia, unspecified |  | | 12,190 12,288 | 52.2% 52.6% | | 0.364 | 0.008 |
|  | **Medication** | | | | | | | | | | | |
|  |  | Cohort | | |  | Mean ± SD | | Patients | % of Cohort | | P-Value | Std diff. |
|  |  | 1 2 | | 6809 | metformin |  | | 13,763 12,764 | 58.9% 54.7% | | <0.001 | 0.086 |
|  |  | 1 2 | | A10BK | Sodium-glucose co-transporter 2 (SGLT2) inhibitors |  | | 1,594 1,217 | 6.8% 5.2% | | <0.001 | 0.068 |
|  |  | 1 2 | | HS501 | INSULIN |  | | 11,877 10,619 | 50.9% 45.5% | | <0.001 | 0.108 |
|  | **Laboratory** | | | | | | | | | | | |
|  |  | Cohort | | |  | Mean ± SD | | Patients | % of Cohort | | P-Value | Std diff. |
|  |  | 1 2 | | 9083 | BMI | 31.2 +/- 6.5 30.7 +/- 5.2 | | 17,304 17,565 | 74.1% 75.2% | | <0.001 | 0.085 |
|  |  | 1 2 | |  | 0 - 0 kg/m2 |  | | 17,311 17,566 | 74.1% 75.2% | | 0.007 | 0.025 |
